# Supplementary material
Source: HighWire-hosted journal article supplement (https://rc.rcjournal.com/highwire/filestream/16349/field_highwire_adjunct_files/0/suppl.pdf)
Supplement: suppl.pdf [file suppl.pdf]

**e-table 1 – Distribution of clinical adverse events related to invasive mechanical ventilation in the two groups**

|                                                        | <b>Passive circuit group (n=23)</b> | <b>Active circuit group (n=20)</b> |
|--------------------------------------------------------|-------------------------------------|------------------------------------|
| <b>Massive tracheal bleeding – n (%)</b>               | 0 (0)                               | 0 (0)                              |
| <b>Tracheal wall instability – n (%)</b>               | 4 (17.39)                           | 3 (15)                             |
| <b>Acute occlusion of the tracheal cannula – n (%)</b> | 0 (0)                               | 2 (10)                             |
| <b>Cannula's damage – n (%)</b>                        | 2 (8.70)                            | 0 (0)                              |
